# Supplementary material for: BEZ235-Mediated PI3K/mTOR dual inhibition improves ovarian follicle survival in a preclinical model
Source: Springer Nature journal article supplement (doi:10.1186/s12958-025-01427-7), 2025-06-19
Supplement: MOESM1 [file 12958_2025_1427_MOESM1_ESM.pdf]

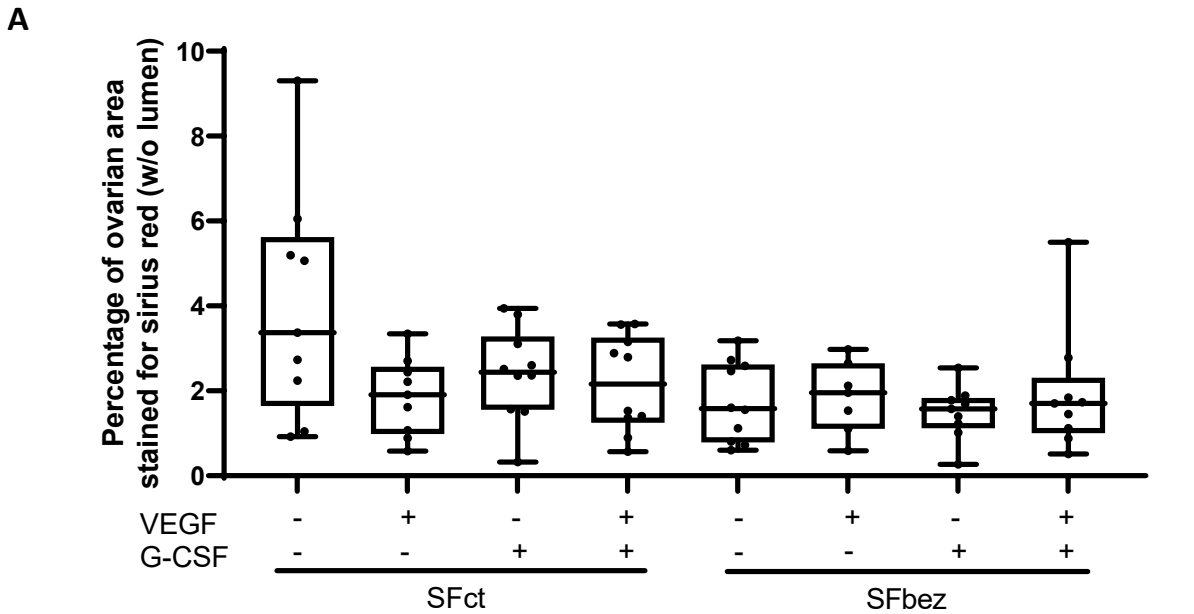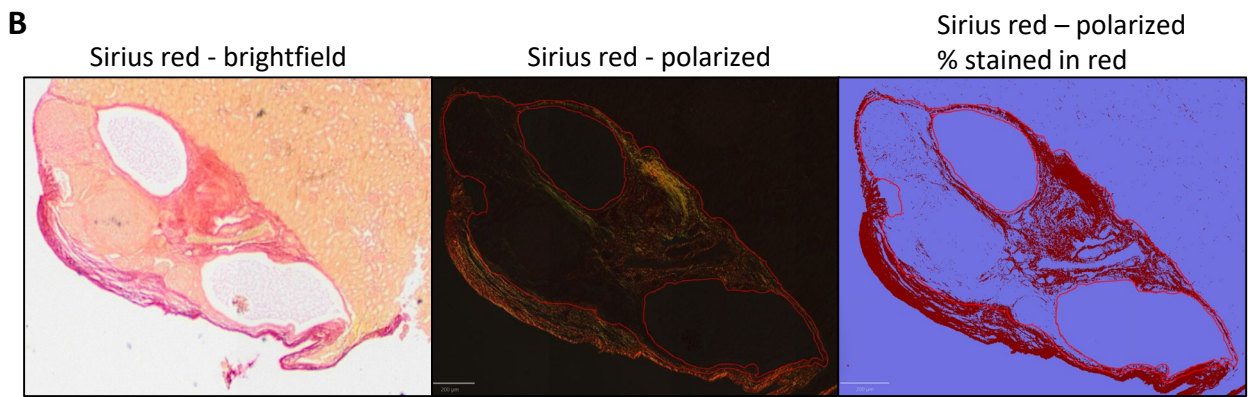

**Figure S1. (A)** Computer assisted quantification of the percentage of ovarian area stained for Sirius red (w/o lumen) in ovaries slow-frozen in control medium or medium supplemented with BEZ235, autotransplanted under the kidney capsule of C57bl/6j mice, followed by injection with VEGF, G-CSF, or a combination of both. **(B)** Representative images of computer assisted quantification of the percentage of ovarian area stained for Sirius red. SFct = slow-frozen/thawed ovaries in control medium, SFbez= slow-frozen/thawed ovaries in medium supplemented with BEZ235. *n* = 9-10 ovaries/group.
